# Supplementary material for: Platelet proteome changes in dogs with congestive heart failure
Source: Research Square preprint supplement (doi:10.21203/rs.3.rs-46168/v3), 2020-11-17
Supplement: Supplementary file 1 [file 429529acbb7ba67cb28ea291.docx]

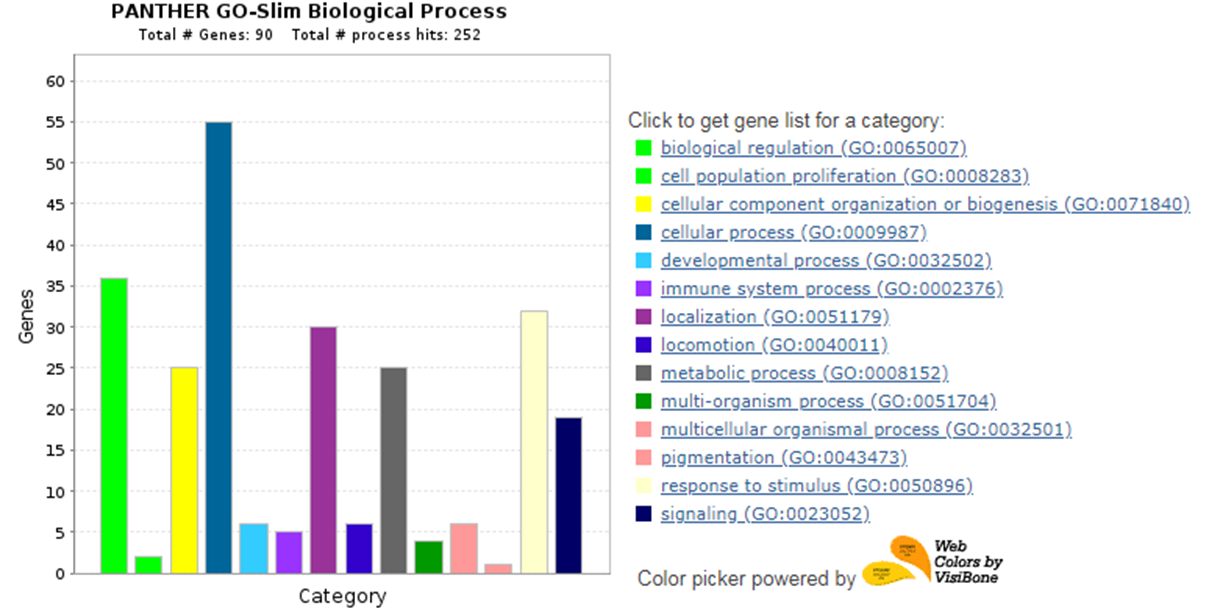


Supplementary Fig 1: Protein classification based on biological processess. Based on the literature the identified 107 proteins could have a role in more than one biological process. Some of the proteins’s biological processess are not known yet.


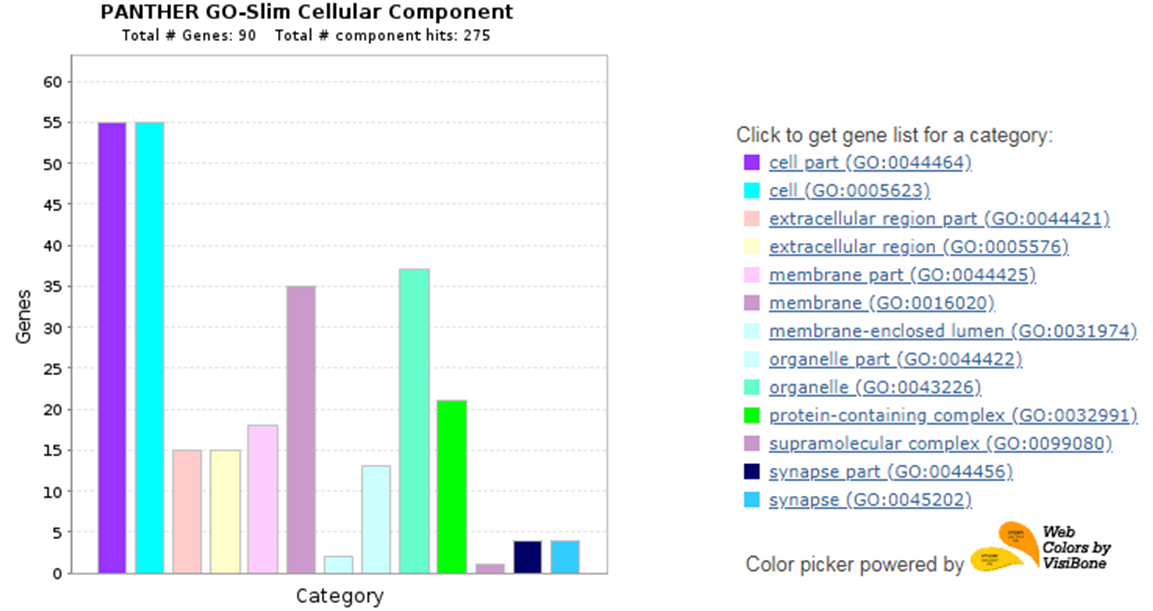


Supplementary Fig 2: The cellular compartment information for the identified proteins.


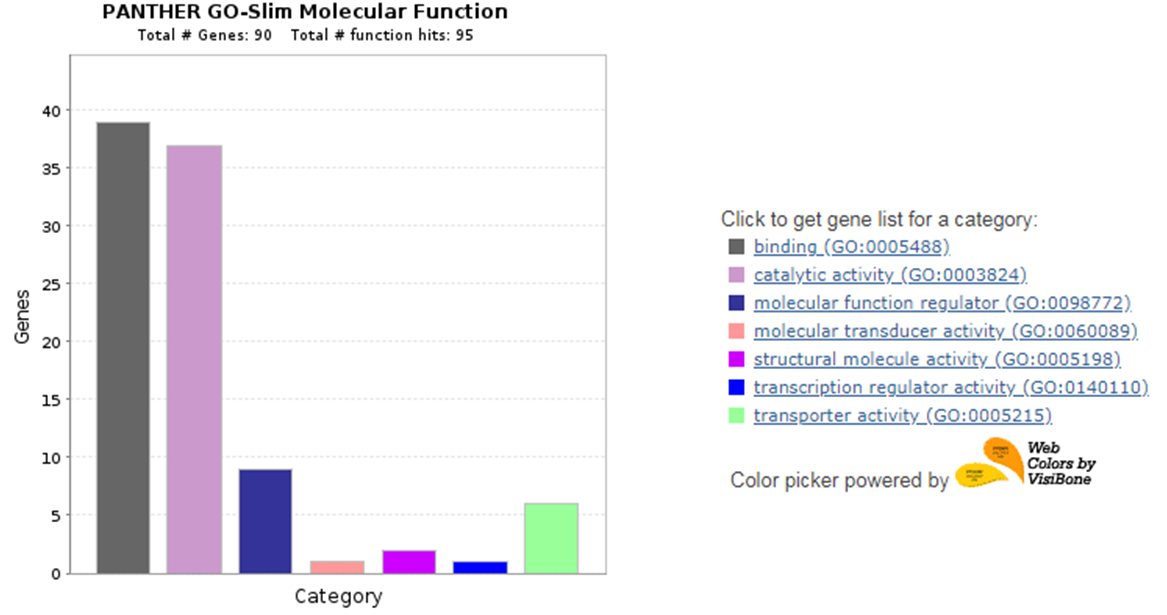


Supplementary Fig 3: Molecular functions carried out by the identified proteins. Only 90 of the 107 identified proteins have known molecular functions.


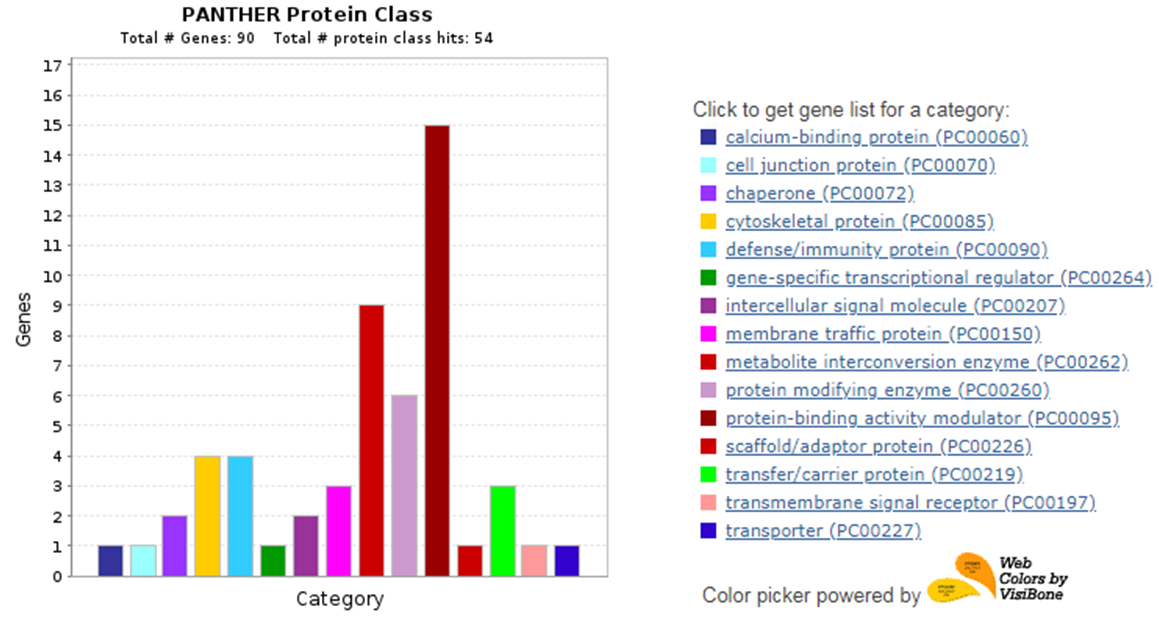


Supplementary Fig 4: Protein class classifications of the identified proteins.


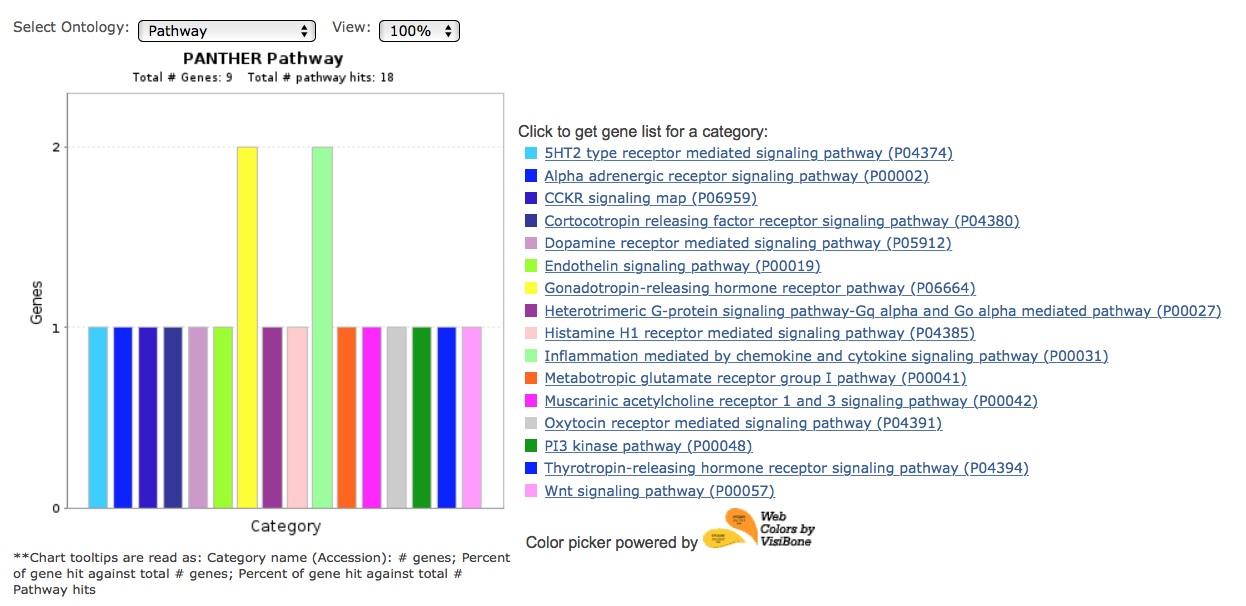


Supplementary Fig 5: Pathway analysis of the identified proteins that were significantly changed.
